# Supplementary material
Source: PubMed Central journal article supplement (PMC141055)
Supplement: pnas_0237313100_1.pdf [file pnas_0237313100_1.pdf]

**Table 1. Cycle numbers for detection within the exponential phase**

| Gene name           | Annealing temp, °C | No. cycles | Forward sequence               | Reverse sequence               |
|---------------------|--------------------|------------|--------------------------------|--------------------------------|
| C1q $\alpha$        | 65                 | 18         | GGACAGCGGCCCAAGGACT            | CAGGCCGAGGGGAAAATGAGGAATC      |
| C1q $\beta$         | 65                 | 18         | CTACGGGGCTACACAGAAAGTCG        | CAGGGAAAAGCAGAAAGCCAGTGAAGA    |
| Cathepsin D         | 60                 | 18         | GGCAACCCGGAGGAGAACTAA          | CCACTGGGAGGGGTATGTC            |
| Cathepsin L         | 65                 | 16         | CAGGGCCAGTGC GGTTCTTGTT        | GTTGTCCCGGTCTTTGGCTATTTTGATGTA |
| CD229/Ly9           | 72                 | 26         | AGGGATGCTAGGGGGTTCTGTGACTTTCTC | GGATTCCAGGCTTTCAGGTATAGGGTAGG  |
| CD48                | 63                 | 21         | ACCACCGGCAGCAATGTAACCCTG       | GTCGTTCTTGCTGCTTACAGGATGTC     |
| CD72                | 72                 | 24         | CTGTCATCTGCCTGGGAGTTCGCTATCTGC | TGCCTCCACTTCTTGCTCATCTGTATCCA  |
| CD84                | 61                 | 21         | ATGGGATTCTGGGGAGTCAGT          | TGGCAACACAGCATGGCGAGGAT        |
| Cystatin F          | 65                 | 21         | CAGCCATGTGGCTGGCCATCTGTCTTG    | ACTTCAGAGTAGCAATATAGAGTCCGC    |
| FKBP65              | 68                 | 26         | ATCGGGGACTTCATTCGCTACCAC       | GCGTCCTTGCCTTCATTCACTTG        |
| GAPDH               | 60                 | 20         | GACCTCAACTACATGGTCTACAT        | TGGTTCACACCCATCACAAACAT        |
| IFN $\alpha$ 204    | 60                 | 22         | CATGATGGAAGAGAAATTTCCAGC       | TGCAGTGAGCACCATCACTGTC         |
| ImmunoRes Gene 1    | 65                 | 21         | ATATGCTGCTTTTGTAAATGGTGTGTC    | AAGGTCTTCGGGGAGTAGTTGG         |
| Interferon $\alpha$ | 54                 | 25         | CTCGTGATGCTGATAGTGATGAGC       | CCACACTTTGCTCTCACACTCACTCC     |
| Interferon $\beta$  | 54                 | 25         | TTCTGCTGTGCTTCTCCAC            | GATTCACTACCAGTCCCAGAGTC        |
| Lipoprotein Lipase  | 68                 | 21         | GTATCGGGCCAGCAACATTATCC        | TGCTTTGCTGGGGTTTTCTTCATTC      |
| Lysozyme M          | 65                 | 21         | TGAAGGCTCTCCTGACTCTGGGAC       | CAGACTCCGAGTTCCGAATATAC        |
| Mall                |                    |            | TTAAGGATCTCGAAGGGAAGTG         | ATGAAAAATAAAACCAAGAAGTGAAGC    |
| MD1/Ly86            | 68                 | 23         | GAAAATGGTTGGCCCAAGCACACG       | TGGCATTGGCACAAGCCACAGTAGC      |
| NGF $\beta$         | 68                 | 26         | CCCTGAAGCCCACTGGACTAAACT       | GCCCCGGCACCCACTCTCAACAGGATT    |
| PAI-2               | 72                 | 22         | AGATGAAGACACCAAGATGGTGCTGG     | AAAGGTCAATTCCTCTCAGACATTCCTG   |
| Properdin           | 65                 | 21         | AGAGACATCAGGGTAGAAGACTGCTG     | ATAGGCTGGTCCAGAGCAGGGTTTC      |
| SAA3                | 65                 | 23         | ATGAAGCCTTCCATTGCCATCATTC      | TCAGTATCTTTTAGGCAGGCCAGC       |
